# Supplementary material
Source: PubMed Central journal article supplement (PMC2885232)
Supplement: supp_M109.078584_jbc.M109.078584-1.pdf [file supp_M109.078584_jbc.M109.078584-1.pdf]

## LEGENDS TO SUPPLEMENTARY FIGURES

**FIGURE S1. Event-free survival plots for 15 ABC genes associated with neuroblastoma patient outcome.** Kaplan-Meier plots were generated for each of 23 individual ABC family genes whose expression levels in 251 neuroblastoma tumours were extracted from microarray data (23). For each gene, the cut-point used to determine 'high'; or 'low' expression is indicated as upper quartile, lower quartile, or upper decile.  $p < 0.05$  was used as the criterion for inclusion in the cluster analysis displayed in Fig. 1. Those genes whose expression was not associated with clinical outcome were: *ABCA3*, *ABCB1*, *ABCB4*, *ABCC2*, *ABCC7*, *ABCC8*, *ABCD4* and *ABCF1*.

**FIGURE S2. MYCN regulates ABCA12 transcription through an indirect mechanism.** *ABCA12* mRNA expression was assessed in SK-N-BE(2)C cells depleted of MYCN. (A) Western blotting showing MYCN levels in cells treated with a MYCN specific siRNA. (B) mRNA levels of control genes and *ABCA12* isoforms were determined by RQ-PCR in cells depleted of MYCN and compared to those of undepleted cells. (C) Chromatin immunoprecipitation was performed in SK-N-BE(2)C cells. Several DNA regions of the *ABCA12* promoters were tested for IP enrichment. Results represent the average of three independent ChIP experiments in which each region was amplified by RQ-PCR in duplicate  $\pm$  SE. Promoter diagram: bent arrow, transcription start site; red arrow, canonical E-box; black arrow, non-canonical E-box; open boxes, amplicons indicated with a capital letter; chromosome and coordinates (bp) are also given.

**FIGURE S3. Specificity of MYCN ChIP assay.** (A) Quantitative ChIP was applied to TET21/N cells exposed to tetracycline and hence repressed for MYCN expression. Fold enrichment is relative to the pre-immune serum. Results represent the average of five independent ChIP experiments in which each region was amplified by RQ-PCR in triplicate  $\pm$  SE. Promoter diagram: bent arrow, transcription start site; red arrow, canonical E-box; black arrow, non-canonical E-box; open boxes, amplicons indicated with a capital letter; chromosome and coordinates (bp) are also given (*left and middle panel*). Dual cross-linking ChIP for the *ABCC3* gene promoter using MYCN, MAX or Sp1 antibodies in TET/21N cells repressed for *MYCN* expression. Results represent the average of three independent ChIP experiments. In all cases, positive ChIP results for MYCN were dependent on *MYCN* expression (*right panel*). (B) Quantitative ChIP and quantitative dual cross-linking ChIP was performed for *APEX-1* and *p21CIP/WAF*, respectively.

**FIGURE S4. MYCN does not associate with promoters of the ABCA1, ABCA6, ABCA7 or ABCD2 genes.** Dual cross-linking ChIP was performed for the *ABCA1*, *ABCA6*, *ABCA7* and *ABCD2* gene promoters using MYCN, MAX or SP1 antibodies in TET/21N cells in the presence of MYCN. Fold enrichment of immunoprecipitated DNA regions was calculated as described above. Results represent the average of three independent ChIP experiments.

**FIGURE S5. Human ABCC3 promoter sequence.** The identified Sp1 binding sites (BS) were found in the promoter region close to the TSS from -39 to +490bp. Site directed mutagenesis was used to mutate the Sp1 BS found in the human *ABCC3* promoter. In red are highlighted the nucleotides mutated and the sequence of the oligonucleotides used are listed below.

**FIGURE S6. c-MYC associates with the promoters of multiple ABC gene family members.** (A) Quantitative ChIP was applied to P493-6 cells in which c-MYC was either expressed (-tet) or not (+tet) and binding of transcription factors was compared between the two conditions. Fold enrichment is relative to the pre-immune serum. Results represent the mean  $\pm$  SE of four independent ChIP experiments in which each region was amplified by RQ-PCR in triplicate  $\pm$  SE. Promoter diagram: bent arrow, transcription start site; red arrow, canonical E-box; black arrow, non-canonical E-box; open boxes, amplicons indicated with a capital letter; chromosome and coordinates (bp) are also given. (B) Dual cross-linking ChIP for the *ABCC3* gene promoter using

c-MYC, MAX or Sp1 antibodies. Results represent the mean  $\pm$  SE of three independent ChIP experiments.

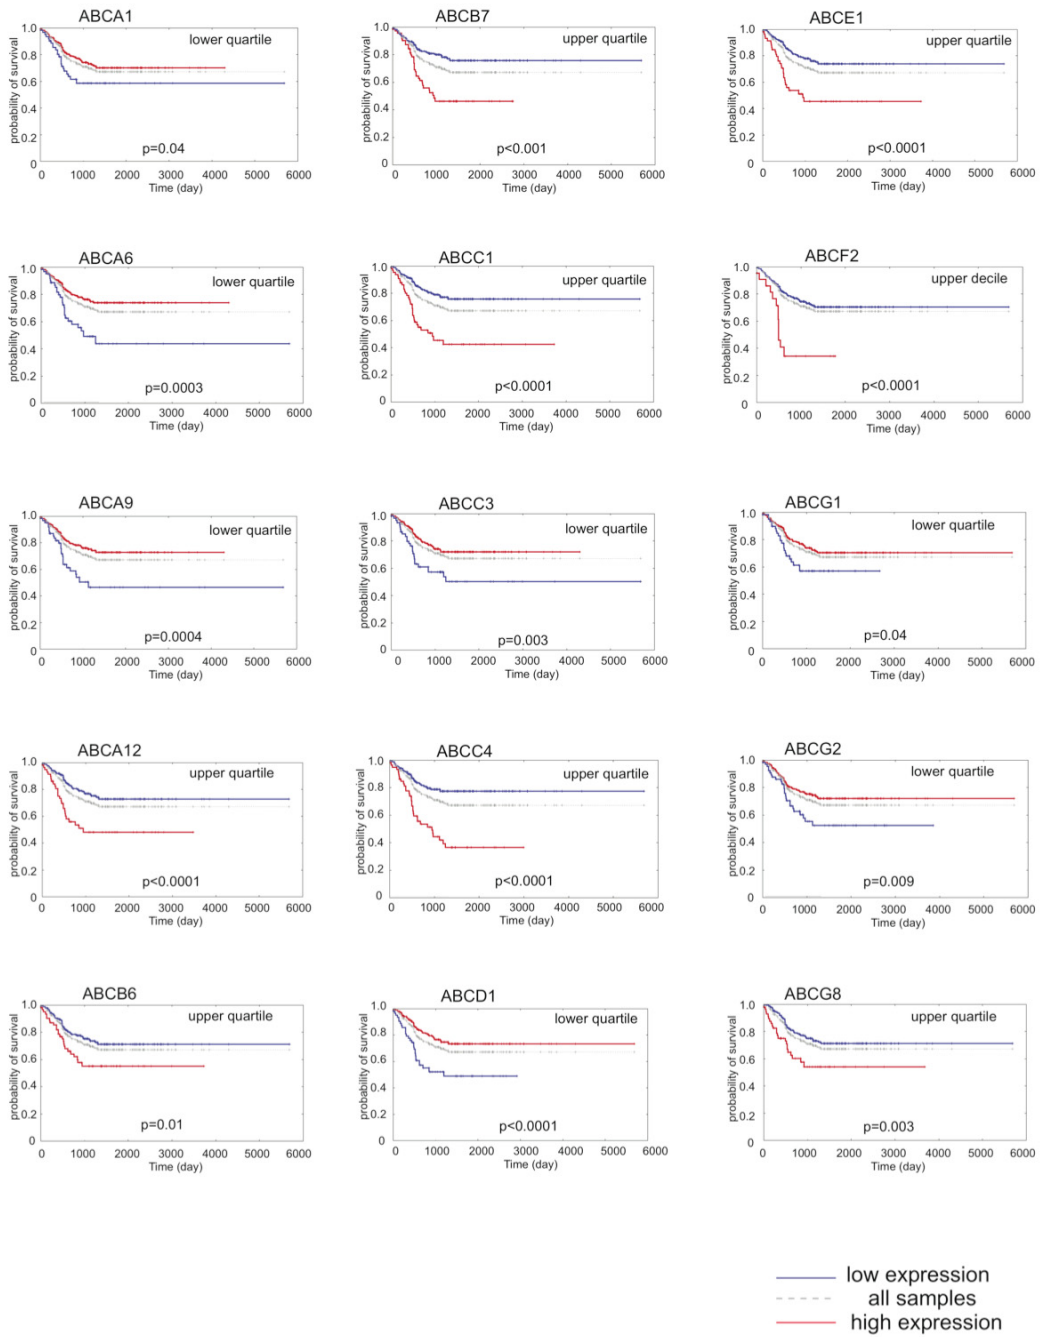

Fig. S1

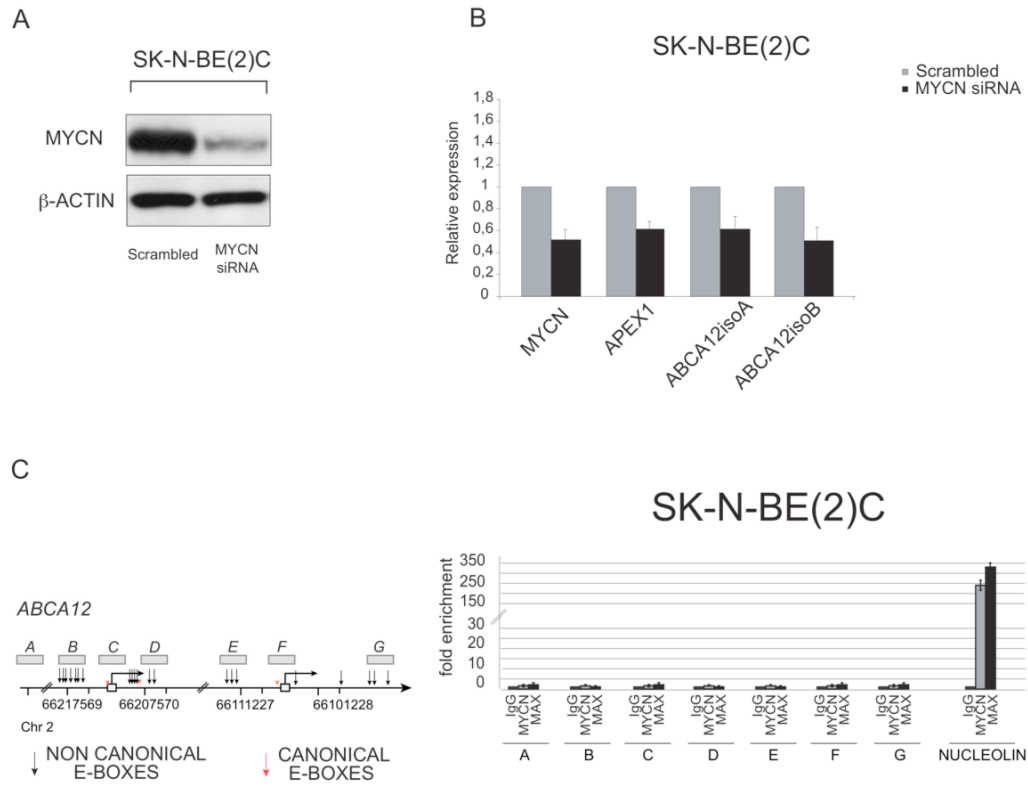

Fig. S2

TET21/N MYCN silenced (+tet)

A.

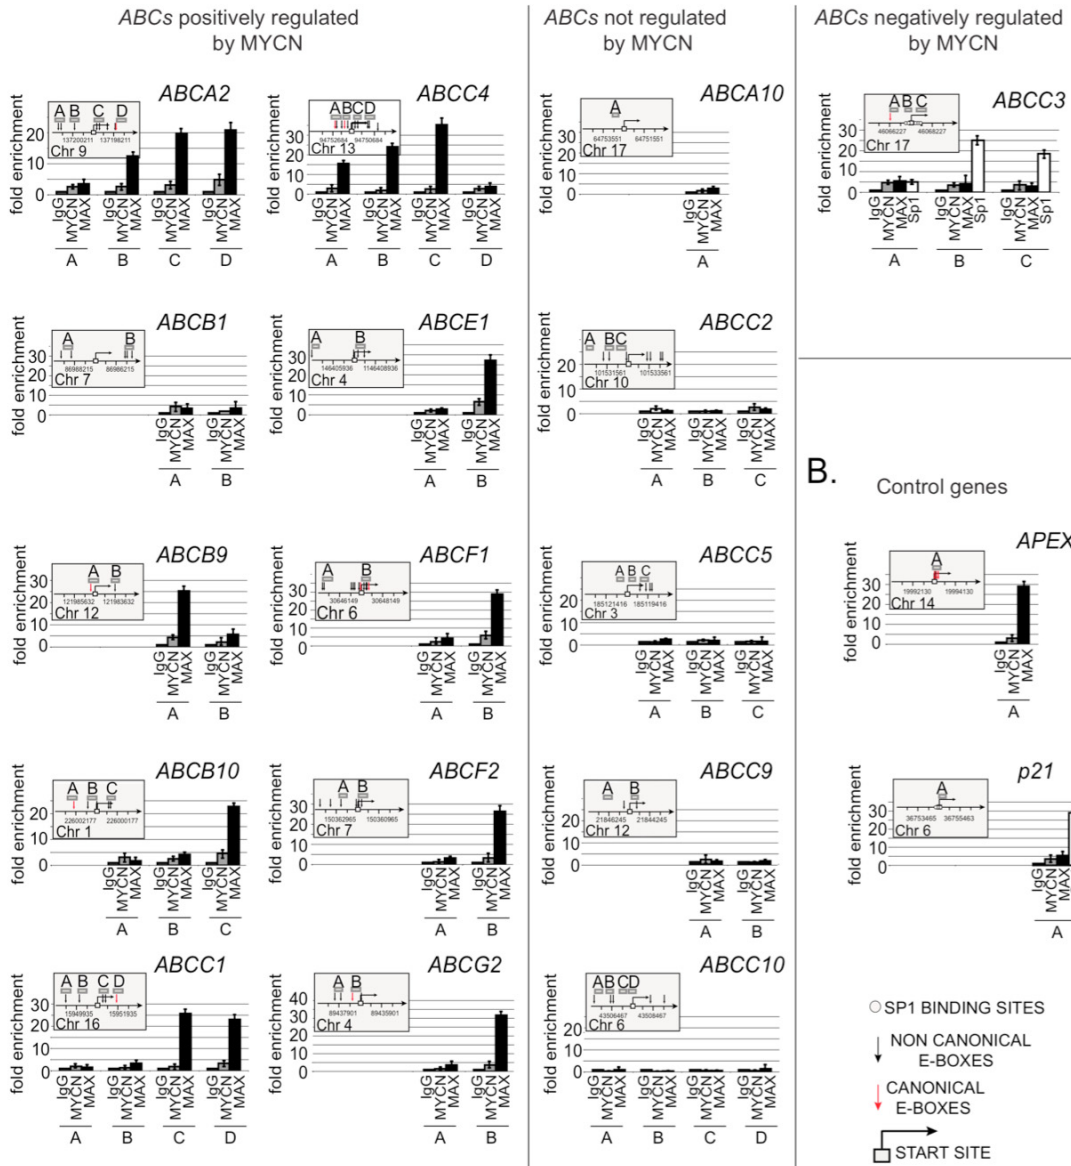

B.

Control genes

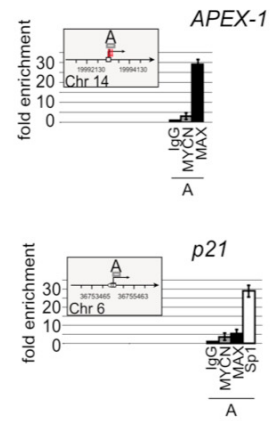

Fig. S3

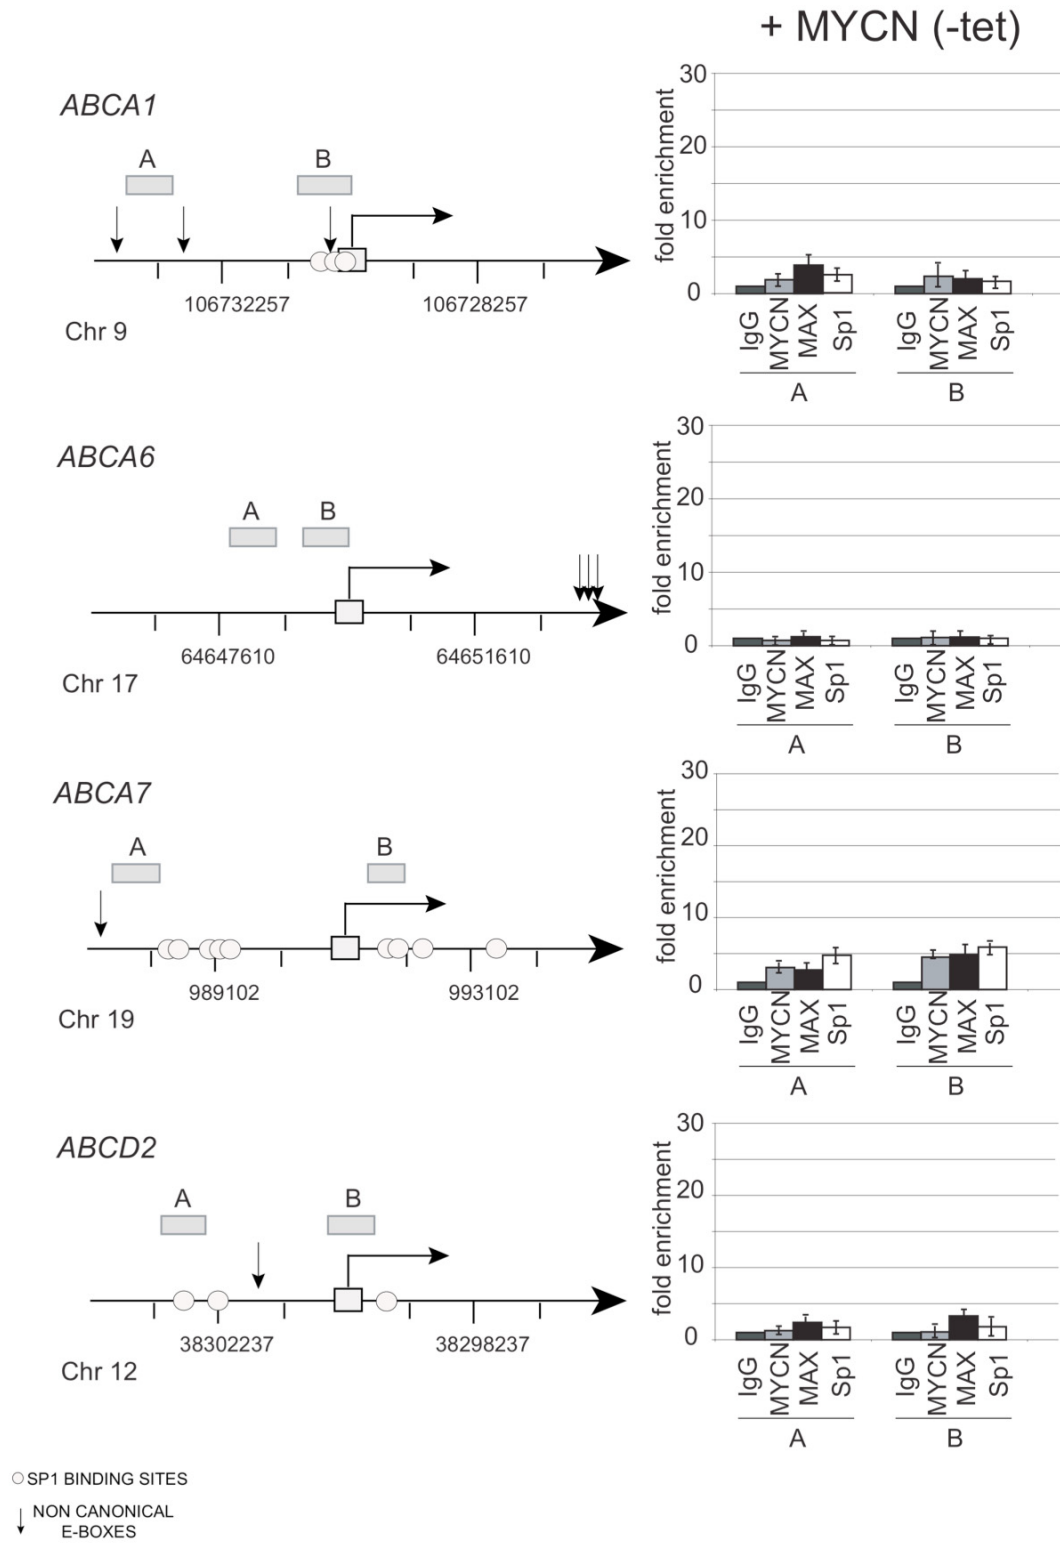

Fig. S4

```

Wt -100 ...CGCTGTCGCAACCCGCGGGACGGGGCAGGGAGACCGGACCAGAGGCACTGGGGTAGGG -40
Mut -100 ...CGCTGTCGCAACCCGCGGGACGGGGCAGGGAGACCGGACCAGAGGCACTGGGGTAGGG -40
Wt -39 CTGGCAGGGCGGGTCCGGCGGAGCGGGGTGCGGAGGGCGGAGGGGCTCCGGC +18
Mut -39 CTGGCAGCTACGGTCCGCTACGAGCGGGGTGCGGAGGGCGGACTACGCTCCGGC +18
Wt +19 CCCGCTCTGCCCGCCGCTGGGTCCGACCGCGCTCGCCTTCCTTGACGCCGCGCCTCGGC +77
Mut +19 CCCGCTCTGCCCGCCGCTGGGTCCGACCGCGCTCGCCTTCCTTGACGCCGCGCCTCGGC +77
Wt +78 CCCATGGACGCCCTGTGCGGTTCGCGGGAGCTCGGCTCCAAGTTCGGGTAAGGCGCGGG +137
Mut +78 CCCATGGACGCCCTGTGCGGTTCGCGGGAGCTCGGCTCCAAGTTCGGGTAAGGCGCGGG +137
Wt +138 GCTCCGGGGTCACTGCGCGGGGGCCAGGGTTCGGCCGGCTTCGCCCGGTCCCGCCGCTG +197
Mut +138 GCTCCGGGGTCACTGCGCGGGGGCCAGGGTTCGGCCGGCTTCGCCCGGTCCCGCCGCTG +197
Wt +198 CCTTCCCGCGGGGCCGGCAGGTATCCCGGGACGGAGCCCTGAGACGGCCCTGGGCGCCCG +257
Mut +198 CCTTCCCGCGGGGCCGGCAGGTATCCCGGGACGGAGCCCTGAGACGGCCCTGGGCGCCCG +257
Wt +258 GGAGGGGGCGATGGCTCGGGAGGGAGGTTGGCTGCGCCGCCCGGAGCCGGGTCCACG +316
Mut +258 GGAGGGCTACATGGGCTCGGGAGGGAGGTTGGCTGCGCCGCCCGGAGCCGGGTCCACG +316
Wt +317 CGGTGTCGGGGACCTGCCCTGCTCTGCCCTTCCCGGCTGCAGCACTGGGGAGCCGGGAA +376
Mut +317 CGGTGTCGGGGACCTGCCCTGCTCTGCCCTTCCCGGCTGCAGCACTGGGGAGCCGGGAA +376
Wt +377 AGTGAGGAAGAGTGC CGCGGCTGGGGCGCAAAGGCACAGTGCCTGGCTGGGTGAGTCGGC +435
Mut +377 AGTGAGGAAGAGTGC CGCGGCTGGCTACCAAAGGCACAGTGCCTGGCTGGGTGAGTCGGC +435
Wt +436 TCCATCCCAGCCCTCCGTCGGGTGCGGAAEGGGCGTTTCGCAATCAGCCGCGGGTTCC +494
Mut +436 TCCATCCCAGCCCTCCGTCGGGTGCGGAAAGCTACTTTCGCAATCAGCCGCGGGTTCC +494
Wt +495 TGATGGAGGGTCTTCCCTCAGCATCTGCCTCAGTTAGGACTCGGTTGCCACCTGGGCA +554
Mut +495 TGATGGAGGGTCTTCCCTCAGCATCTGCCTCAGTTAGGACTCGGTTGCCACCTGGGCA +554
Wt +555 TGGATTGCCCCAGGGCATCCAGAGCACCTGCTCAACCAGGTGTTT... +600
Mut +555 TGGATTGCCCCAGGGCATCCAGAGCACCTGCTCAACCAGGTGTTT... +600

```

|     |                                           |          |
|-----|-------------------------------------------|----------|
| wt  | AGGG CTCGGCAGGG CGGGTCCGGG CGGAGCGCGG GGT | Sp1 BS-1 |
| mut | AGGG CTCGGCAGCT ACGGTCCGCT ACGAGCGCGG GGT |          |
| wt  | CGGAGG GCGGAGGCGG CTCCGGCGCC              | Sp1 BS-2 |
| mut | CGGAGG GCGGACTACG CTCCGGCGCC              |          |
| wt  | GCCCCGGA GGGGGCGATG GGCTCGGG              | Sp1 BS-3 |
| mut | GCCCCGGA GGGCTACATG GGCTCGGG              |          |
| wt  | GTG CGCGGCTGGG GCGCAAAGGC ACAGTG          | Sp1 BS-4 |
| mut | GTG CGCGGCTGGC TACCAAAGGC ACAGTG          |          |
| wt  | GGTG CGGAAGGGG GTTTCGCAAT CAGC            | Sp1 BS-5 |
| mut | GGTG CGGAAGGCTA CTTTCGCAAT CAGC           |          |

Fig. S5

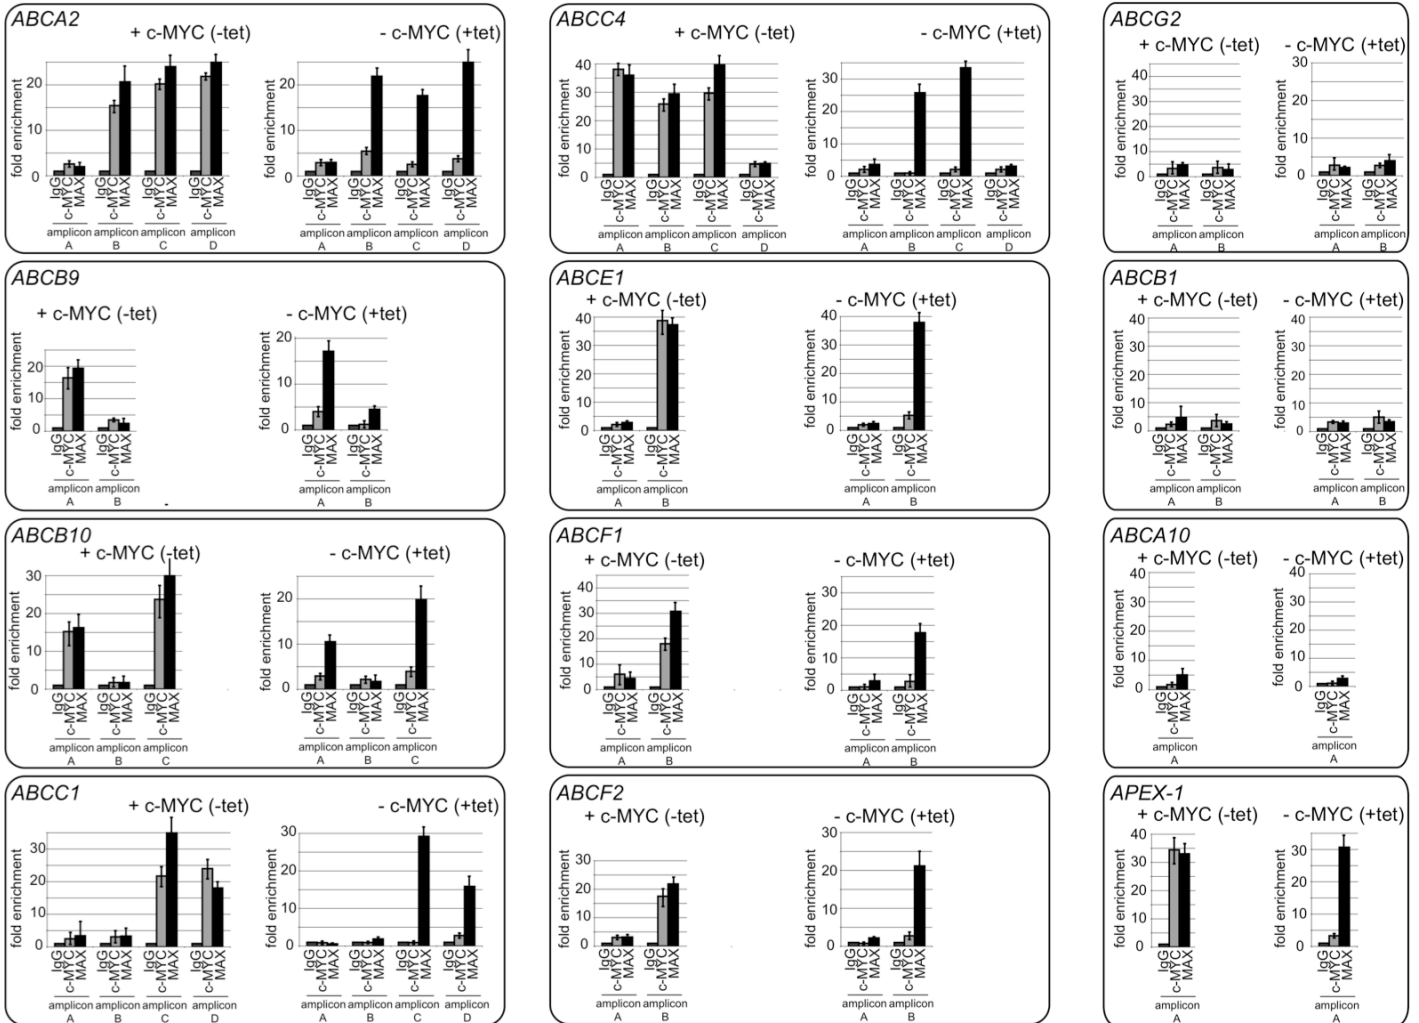

Fig. S6



**Table S1. DNA sequence of primers and TaqMan assay codes of assays used for quantitative RT-PCR**

| <b>Primers for RQ-PCR on Cell Line RNA</b> |                             |
|--------------------------------------------|-----------------------------|
| ABCA1 F                                    | ACCACTGTTACCAGAGGAGATGC     |
| ABCA1 R                                    | CACTCACCAACCTTGCCAACTTC     |
| ABCA2 F                                    | GGTGTGCGTCCTGGCGAG          |
| ABCA2 R                                    | CATCTTGAAGGTGCTGGTCTTGC     |
| ABCA3 F                                    | GTCCGAGAGCACCTTTATTTTC      |
| ABCA3 R                                    | GTATCAGCACCTTGGAGCC         |
| ABCA4 F                                    | TTCATCGGCATCAACAGCAGTG      |
| ABCA4 R                                    | TTCTTCCAATCAGGTCCCAGTG      |
| ABCA5 F                                    | GGAACGAACACAAGAAGATAGAGTAG  |
| ABCA5 R                                    | CCAGTAAGCAGACCGAACAATAC     |
| ABCA6 F                                    | GTTCTTCATATACCTTGCTTG       |
| ABCA6 R                                    | ATTCTCTGTAGTGCTCCTGG        |
| ABCA7 F                                    | GCAGGCACCTACAGCGGAG         |
| ABCA7 R                                    | CTGTGGTCCGGCTCGTCCAG        |
| ABCA8 F                                    | CTGGAAAGGGCTGAGGAAAGG       |
| ABCA8 R                                    | ACTAACCGTGTGATGGCAACC       |
| ABCA9 F                                    | TCGCCATCACACGGTTAG          |
| ABCA9 R                                    | CCAATACATCTCAGCCTTCC        |
| ABCA10 F                                   | ATGTTTGTGTTTGGTGGTATGC      |
| ABCA10 R                                   | TTGCGAAAGAATGAAAGC          |
| ABCA12 F iso A                             | ACCTCGCACCTCGAAACCTTCC      |
| ABCA12 R iso A                             | AAGCAGATCTTGTGGGCCATAGGG    |
| ABCA12 F iso B                             | ATTTCCAACAAAAGAGCATAGATG    |
| ABCA12 R iso B                             | CCCAGGTCAAATTAATGAGGAG      |
| ABCA13 F                                   | TCAAGGATAAAACAAGCACGC       |
| ABCA13 R                                   | CTAACAAGGAGATTCAAATAGAAAATG |
| ABCB1 F                                    | CATCATCAAGTGGAGAGAAATCATAG  |
| ABCB1 R                                    | TTAGCAAGGCAGTCAGTTACAG      |
| ABCB2 F                                    | GATGTCTCCTTTGCCTACCC        |
| ABCB2 R                                    | CGTCTACCTCTGTGTCATAGC       |
| ABCB3 F                                    | TGGTGGGGTGGAGAGGTGGGG       |
| ABCB3 R                                    | TGATGGGACAGGCAGCAAATAGCAAC  |
| ABCB4 F                                    | ACACAAACCAGACAGCATCAAAGG    |
| ABCB4 R                                    | CTCTTCCCACAGCCACTACTTCC     |
| ABCB5 F                                    | ACCAACTCACTTCTCTGTC         |
| ABCB5 R                                    | CTGCCGTAAAATAATCCCTGC       |
| ABCB6 F                                    | ACACCATCGCCGACAATATCCG      |
| ABCB6 R                                    | GCAGCAGCCTCCACCTCATC        |
| ABCB7 F                                    | TCGGTTCCTCTTTCTCGCTC        |
| ABCB7 R                                    | TGCCTTTTCCAATCTCTGCC        |
| ABCB8 F                                    | CCAGGAGCCACCAGCACAAG        |
| ABCB8 R                                    | GAGCAGGAGCAGCCGCAG          |
| ABCB9 F                                    | CTTCGCCAATGAGGAGGAGGAGGAG   |
| ABCB9 R                                    | CTGTAGACGGAGCCCACGG         |
| ABCB10 F                                   | AACAGCGGATTGCATTGCC         |
| ABCB10 R                                   | ACACCGTTCTTCCATCCATCAGG     |
| ABCB11 F                                   | AAGGGAAGGTGATGATAGATGG      |
| ABCB11 R                                   | TGAGCGGAGGAACTGGAC          |

|          |                               |
|----------|-------------------------------|
| ABCC1 F  | CCAAACCCAGACAACCAAAC          |
| ABCC1 R  | GGAAGCACCAGGAAACCAC           |
| ABCC2 F  | TCAGCGAGACCGTATCAGG           |
| ABCC2 R  | TCACCAGCCAGTTCAGGG            |
| ABCC3 F  | GTCTCCTGTATGTGGGTCAAAGTG      |
| ABCC3 R  | CTGTGGCGAGCGTATCTTGTTG        |
| ABCC4 F  | ATGATTTGCTGCCGCTGAC           |
| ABCC4 R  | CTGACACCTCTCTTCTGCTTTG        |
| ABCC5 F  | CAAGAGACCATCCGAGAAGC          |
| ABCC5 R  | GAAACACACAAGCCAATCCG          |
| ABCC6 F  | AGGAGATAGAGGAGAAGGAGAACAGAACC |
| ABCC6 R  | CAGAGGAAGAGGAAGAGTGCGTAGAGG   |
| ABCC7 F  | GCAACAGTGGAGGAAAGCC           |
| ABCC7 R  | TGGGTTTCATCAAGCAGCAAG         |
| ABCC8 F  | AAGATCCAGATCCAGAACCTGAGC      |
| ABCC8 R  | TGTCCACCATGCGGAAGAAGG         |
| ABCC9 F  | TTGGTGTGCCTTTTATTTTATCC       |
| ABCC9 R  | CCGAATGGTGGTGAGTCC            |
| ABCC10 F | CCTTCATCCTCAACATCCTCC         |
| ABCC10 R | GCAAACCTGGCACCTCTGG           |
| ABCC11 F | CGTGGCTTTTGGCATTTC            |
| ABCC11 R | GGGTCTCTTGTCTCTGTATTTTC       |
| ABCC12 F | CATCACCTATCACCTCCTCTAC        |
| ABCC12 R | GGCTTGCGTCTCTGTTCC            |
| ABCC13 F | GACTCTGGCTGCTATGTGG           |
| ABCC13 R | CTCGCTTCCTCTCTCAACC           |
| ABCD1 F  | AGCCTTCACTATTGCCCG            |
| ABCD1 R  | CTTCCTCCACCCTGATGTTG          |
| ABCD2 F  | AACCCTGACCAATCTCTTAGG         |
| ABCD2 R  | GCACATACCGCAAATAGCC           |
| ABCD3 F  | ACAGAAGATACAGTTGAGTTTGG       |
| ABCD3 R  | CAGGTTACAGTGATTGAAGCC         |
| ABCD4 F  | CGACCTGTCCACGACGCTC           |
| ABCD4 R  | TGCTGTGTCTGCTGGCTCTG          |
| ABCE1 F  | TAACCCACCTAAAAGAACGAAATG      |
| ABCE1 R  | AAACGACAGCACAAGCAAATC         |
| ABCF1 F  | ACTGCTGATGCTGGTGAG            |
| ABCF1 R  | GCCTGCTTGGTGGACTTC            |
| ABCF2 F  | GTTTGAGGGTGGTATGATGC          |
| ABCF2 R  | CTGCTGAATGAGTCTGAAGTC         |
| ABCF3 F  | AGTGTGCGAGAGGAGTGC            |
| ABCF3 R  | AAGCCCAGCGAGAATGAC            |
| ABCG1 F  | TGGGTTTGTGGGTGTCTCG           |
| ABCG1 R  | ACGGTGCCTGGTGCTAAG            |
| ABCG2 F  | CTTCTTCCTGACGACCAACC          |
| ABCG2 R  | TCTGTAGTATCCGCTGATGTATTC      |
| ABCG4 F  | ATCCTGACGATCTATGGCATGGAG      |
| ABCG4 R  | GTAACGCAGCACAAGGTAGGC         |
| ABCG5 F  | TTGTGCTCCTCCTGGTGG            |
| ABCG5 R  | TTCCCGTTCCTTGCTTTGG           |

|         |                       |
|---------|-----------------------|
| ABCg8 F | TATGGAAAGCAGAGACGAAGG |
| ABCg8 R |                       |

**Table S2: DNA sequence of primers used for quantitative ChIP.**

|                     |                                |
|---------------------|--------------------------------|
| abca1 amplicon A F  | CTGGAGGTGGAAGAGAAGTAGG         |
| abca1 amplicon A R  | AGATTCATAGAAGACTCAGGACAGACC    |
| abca1 amplicon B F  | CGGAAAGCAGGATTTAGAGGAAGC       |
| abca1 amplicon B R  | GCAGAGGTTACTATCGGTCAAAGC       |
| abca2 amplicon A F  | ACTACATTACGGAGAAATTCTGGCG      |
| abca2 amplicon A R  | CCTCATAGACTTGGCTGCGGG          |
| abca2 amplicon B F  | GGAGGGCGGTGGACAATAAACATCTGAG   |
| abca2 amplicon B R  | TCTGGCGGAGGCTGTAGGAACTGG       |
| abca2 amplicon C F  | GCCTGTCCTCTGTCGCTCTCTAC        |
| abca2 amplicon C R  | GGGTCTCCTGTGTGCTTTGTAAAC       |
| abca2 amplicon D F  | GGGAGGTGGCTCGGTCTGTGTC         |
| abca2 amplicon D R  | AGGAGGGGAGGCGGAGAGATGC         |
| abca12 amplicon A F | GCCATTCTCCTGCCTCAGTCTC         |
| abca12 amplicon A R | TAACACGGTCAAACCCTGTCTCTAC      |
| abca12 amplicon B F | TCCATGAAGAAACAAGCGATAGTAG      |
| abca12 amplicon B R | AGCGTAGAGTATTCAGAAAGATCATC     |
| abca12 amplicon C F | GAAATGTCTTGGATCAGCCTGTGTC      |
| abca12 amplicon C R | GGTCCCACCTTTCATCACAATGTAC      |
| abca12 amplicon D F | AAAGGAATTGGTTTCTGGGAGTTG       |
| abca12 amplicon D R | AAAGTGCTGGTTTCTGTGTGATG        |
| abca12 amplicon E F | ATACTAGGAACTACCCAGATGGC        |
| abca12 amplicon E R | AAACTCAATGTGTATTCCAGCAATAG     |
| abca12 amplicon F F | ACGTGGTAGTCAATCTTCATTATAG      |
| abca12 amplicon F R | ATCAAAATAATCCCGATGGTCAAG       |
| abca12 amplicon G F | AGATAGAGGCGTGAACCTGAAAGAC      |
| abca12 amplicon G R | AAGGAAGTCAGGATCTAGGCTCAG       |
| abcb1 amplicon A F  | TCTCGTCTAACCAAGTTGTCTATCTTC    |
| abcb1 amplicon A R  | TACCAGCATTTATTATTAAGTTTAGTGAGG |
| abcb1 amplicon B F  | TGGGACATCTGAAATG               |
| abcb1 amplicon B R  | AAGGGTACATATTAGGACAACAGTCATTC  |
| abcb9 amplicon A F  | TCCCTCCTCCACTACCCCTCTC         |
| abcb9 amplicon A R  | TCTTTCTCCGCAGACCGTTTCC         |
| abcb9 amplicon B F  | GAGTGGTGGAAAGTATGTGGGATTTG     |
| abcb9 amplicon B R  | AAGGGCAGTTAGGCGGGTAATG         |
| abcb10 amplicon A F | GCACTAAAATGTTTATGTTGATTATTGAGG |
| abcb10 amplicon A R | ATTTGAAGACAGGCGTGGTTCG         |
| abcb10 amplicon B F | GCTCGTGTGTTCCCAAGTTC           |
| abcb10 amplicon B R | GCTGTCACCCGCCTTATCG            |
| abcb10 amplicon C F | CGTGTACCCGCCCTCTCCTG           |
| abcb10 amplicon C R | GCCTAAGCCAAAACAGATGCTCCCACTAAG |

|                     |                                 |
|---------------------|---------------------------------|
| abce1 amplicon A F  | TCAGGAACTGGGCATCTTTCTAC         |
| abce1 amplicon A R  | TTTGATTCTGTGCTCTTTGACTAC        |
| abce1 amplicon B F  | CGAGAATGGACCTAGATGCCGTAG        |
| abce1 amplicon B R  | ATCATTTCTATAAAGCCTGGGAGTGG      |
| abcf1 amplicon A F  | CTCTTGCCTCCTTCCTGTTTGTTT        |
| abcf1 amplicon A R  | TCTTCTACGCTCTTGGGATACTACTG      |
| abcf1 amplicon B F  | GCAAGGAAGAAACGAGCAGAGG          |
| abcf1 amplicon B R  | GCCCAGTCTCACTTAGGTCACG          |
| abcf2 amplicon A F  | AATGTAGGTAATGTGAAGTCCTTGAGAG    |
| abcf2 amplicon A R  | GCATTGTTAGGTTTCCACTGAAGC        |
| abcf2 amplicon B F  | GGAGACTCGGAGGGGACTCAC           |
| abcf2 amplicon B R  | CTCAGCGGCTCTTCTAATCTTAACATC     |
| abcg2 amplicon A F  | TGTATAGTCAATTTTCTTATCTAGGCTTCC  |
| abcg2 amplicon A R  | CCATCCCAACATCTACCTGCTG          |
| abcg2 amplicon B F  | GTAGTTAATCACTCTGGTTCATTCCGTTCCG |
| abcg2 amplicon B R  | TGCGGCTGGAGGTCACGATGG           |
| abca10 amplicon A F | AGCAACATCACCAACCTTATATTTCCC     |
| abca10 amplicon A R | TTAGTCAGTAAACACTCACTCAGTAAAGC   |
| abcc1 amplicon A F  | TCCCTTAGAACTCATTACCCCTTGG       |
| abcc1 amplicon A R  | ATAGGCAGACAGGTAGAGACAGAGG       |
| abcc1 amplicon B F  | ATGTCTCCAGGCTTCAGTTTCC          |
| abcc1 amplicon B R  | CCCGAGGTCACACAGTTAATAAGG        |
| abcc1 amplicon C F  | GATGGCTCCGACCCGCTCTGG           |
| abcc1 amplicon C R  | GCTCCGCAGGAACTGAGTCACC          |
| abcc1 amplicon D F  | TGATGTGCCCTACCTGACCCTCGG        |
| abcc1 amplicon D R  | AGAGAGAAACAGTCGTGTCCAGATTTGCC   |
| abcc2 amplicon A F  | CACCAGTGCCAAGAGAAGTATGC         |
| abcc2 amplicon A R  | TCACCAGAAGAGCCAGGAAAGG          |
| abcc2 amplicon B F  | CCAAGGCAGAAGGATTGTTGAAGC        |
| abcc2 amplicon B R  | AACAGAGTGGTGGCATCAGTCG          |
| abcc2 amplicon C F  | TCCCATTTGGCATACTACCTC           |
| abcc2 amplicon C R  | CACTGAAAGATGTCAACAGAGC          |
| abcc3 amplicon A F  | AGGAGAAGGAGAGCACTGACAAG         |
| abcc3 amplicon A R  | TGAATGGAAAGGGTAGGCAAAGC         |
| abcc3 amplicon B F  | CCCCACCTCTGCCCAAAGTCC           |
| abcc3 amplicon B R  | CGCCCTGCCGAGCCCTACC             |
| abcc3 amplicon C F  | GATGGGCTCGGGAGGGAGGTTG          |
| abcc3 amplicon C R  | CTAGAGAAAAGAAGGTGGCAGGAAAC      |
| abcc4 amplicon A F  | CCACTGTTATCTGTTAGGCTTTAGGG      |
| abcc4 amplicon A R  | CTTCTCAGGACCAAACGACGG           |
| abcc4 amplicon B F  | CGCCTAGACTCGGATAGTGAATTC        |
| abcc4 amplicon B R  | GGATGGAGAGGGTAGCAGAGC           |
| abcc4 amplicon C F  | GTCCCCGCCGAAACAGGTCAC           |
| abcc4 amplicon C R  | CGCCACCCGCAGCAGAAAGCC           |
| abcc4 amplicon D F  | CTTTTGCCTCTTTGTGGGAATCTC        |
| abcc4 amplicon D R  | GGGGTGGTTTTAAGAAGGTAGAACTC      |
| abcc5 amplicon A F  | GGGTGGGACTGCTCTGCCTACG          |
| abcc5 amplicon A R  | TGCCTCTGCGAGACTGTCTGGAATC       |
| abcc5 amplicon B F  | TCTCCTGCCGCCGCTCCTAG            |
| abcc5 amplicon B R  | TCCCGATCCTACCTGCCTGTCTTCC       |
| abcc5 amplicon C F  | TCTTGGAGGAGGAGATGGCTAGG         |

|                     |                                |
|---------------------|--------------------------------|
| abcc5 amplicon C R  | AGACACCACGCTAAAGGGATACG        |
| abcc9 amplicon A F  | GCAGGTTGGAGGTTGTGTAATACG       |
| abcc9 amplicon A R  | CAAACAGATGGGAGATGAGCAAAGG      |
| abcc9 amplicon B F  | CTAATGGCTGAGATTTGGGATAATGTTG   |
| abcc9 amplicon B R  | ACTGCTGCTGCTACCTGAAGG          |
| abcc10 amplicon A F | GACTGGCACTACACTAAGCATTATCTC    |
| abcc10 amplicon A R | GGCTCTACACTTACTGGTTCAATCAC     |
| abcc10 amplicon B F | CCGTGGCTTAGTGGCTCCTG           |
| abcc10 amplicon B R | CCTACCTGGCTCGTGTCTTCC          |
| abcc10 amplicon C F | GGAAGACAAGGAGGCACATCG          |
| abcc10 amplicon C R | GTTCTGAGGTAAAGTGGAGTAGGG       |
| abcc10 amplicon D F | TCATTTTCTAAACTACCCACACCATTTT   |
| abcc10 amplicon D R | CCCGTCTCAGCCTCCCAAAG           |
| abca6 amplicon A F  | ACTTTGATTTCTGTTTTGCCATTC       |
| abca6 amplicon A R  | ATTTGTTGCTCCCACCCTCTTC         |
| abca6 amplicon B F  | TTCTTGTTCTGCCTCCATCTTG         |
| abca6 amplicon B R  | TTTCTGTGTCTCTTTCTCCCTAAGC      |
| abca7 amplicon A F  | GACCCACACGCTCCCATTTT           |
| abca7 amplicon A R  | AACGCTCCTCGGCTTCTGC            |
| abca7 amplicon B F  | CCCACCGTCTCCCACCTATTC          |
| abca7 amplicon B R  | GAACAGCCACCAGGATGAAGAAG        |
| abcd2 amplicon A F  | TGACTGGAAATGTGTATGTATGTTGGG    |
| abcd2 amplicon A R  | CTGCTTGCTCTTCTGCTTGTGG         |
| abcd2 amplicon B F  | GTTCTTCTCCCTCCTCGTCTC          |
| abcd2 amplicon B R  | GTAAGATTTTCAAGTAGATACCGCAAACAG |

**Table S3. Data values ( $\ln 2^{-\Delta(\Delta C_t)}$ ) of ABC transporter genes expression used to generate the hierarchical clustering in TET21N cell line.**

|        | tet 0h | tet 12h      | tet 24h      | tet 48h      |
|--------|--------|--------------|--------------|--------------|
| abca2  | 0      | -0.25812327  | -0.142139767 | -0.328504067 |
| abcb1  | 0      | -0.549046837 | -0.967584026 | -1.03563749  |
| abcb7  | 0      | -0.053928342 | -0.265703166 | -0.360252765 |
| abcb9  | 0      | -0.162518929 | -0.253602759 | -0.436955775 |
| abcb10 | 0      | -0.562118918 | -0.494296322 | -1.108662625 |
| abcc1  | 0      | -0.266573109 | -0.391562203 | -0.507497834 |
| abcc4  | 0      | -0.717439873 | -0.415515444 | -0.400477567 |
| abcd3  | 0      | -0.061875404 | -0.556287998 | -0.653926467 |
| abce1  | 0      | -0.597837001 | -0.502526821 | -1.427116356 |
| abcf1  | 0      | -0.251671635 | -0.349557476 | -0.536143432 |
| abcf2  | 0      | -0.405465108 | -0.567984038 | -0.488846717 |
| abcf3  | 0      | -0.252744021 | -0.333144447 | -0.567984038 |
| abcg2  | 0      | -0.661648514 | -0.510825624 | -0.572701027 |
| abca4  | 0      | -0.030459207 | -0.005012542 | -0.083381609 |
| abca5  | 0      | 0.055119299  | 0.013245227  | -0.15082289  |
| abca10 | 0      | 0.097126711  | 0.243730185  | 0.499562431  |
| abcb2  | 0      | 0.126632651  | 0.117783036  | 0.292669614  |
| abcb4  | 0      | 0.412109651  | -0.174353387 | -0.13926207  |
| abcb6  | 0      | -0.356674944 | 0.039220713  | -0.010050336 |
| abcb8  | 0      | -0.006688988 | 0.070769071  | 0.116300456  |
| abcc2  | 0      | 0.186479567  | 0.21913553   | 0.242946179  |
| abcc5  | 0      | -0.051293294 | -0.139262067 | 0.099845335  |
| abcc9  | 0      | 0.3074847    | 0.223143551  | -0.083381609 |
| abcc10 | 0      | 0.262364264  | 0.273836666  | 0.357674444  |
| abca1  | 0      | 0.792992516  | 1.10856262   | 0.947789399  |
| abca3  | 0      | 0.292669614  | 0.966983846  | 0.817574759  |
| abca6  | 0      | 0.420900916  | 1.474763009  | 1.550395372  |
| abca7  | 0      | 0.954228571  | 1.362684495  | 1.4762874    |
| abca8  | 0      | 0.168335315  | 0.536493371  | 0.864295437  |
| abcg8  | 0      | 0.207014169  | 0.21511138   | 0.848011891  |
| abcc3  | 0      | 0.656223826  | 1.398716881  | 1.623998064  |
| abcd1  | 0      | 0.159848701  | 0.894726554  | 0.53454215   |
| abcd2  | 0      | 1.057790294  | 0.938052224  | 1.387543581  |
| abcd4  | 0      | 0.593326845  | 0.708035793  | 0.970778917  |
| abcg4  | 0      | 0.688134639  | 0.623261053  | 0.675492245  |

**Table S4. Data values ( $\ln 2^{-\Delta(\Delta C_t)}$ ) of ABC transporter genes expression used to generate the hierarchical clustering in 6 neuroblastoma cell lines.**

|        | SKNBE | LAN1  | SHSY5Y | SHNSK  | SHEP  |
|--------|-------|-------|--------|--------|-------|
| MYCN   | 6.42  | -1.68 | -2.18  | -10.08 | 7.52  |
| abca2  | 0.73  | 0.93  | -0.12  | -0.07  | -0.37 |
| abcb9  | 2.96  | 1.46  | -1.79  | -1.99  | -0.64 |
| abcb10 | -0.48 | -0.28 | 0.62   | -0.78  | 1.22  |
| abcc1  | 1.74  | 1.74  | 0.04   | -0.36  | -1.16 |
| abcc4  | 1.72  | 1.82  | -1.08  | 0.02   | -1.28 |
| abce1  | 1.22  | 0.82  | -1.58  | -0.18  | -0.28 |
| abcf1  | -0.26 | 0.44  | -0.26  | 0.24   | -0.16 |
| abcf2  | 1.8   | -0.2  | -0.8   | 0.4    | 0.6   |
| abcg2  | 4.08  | 3.08  | -1.12  | -4.32  | -1.72 |
| abcc3  | -1.61 | -6.01 | -2.56  | 2.84   | 5.34  |

**Table S5. Data values ( $\ln 2^{-\Delta(\Delta C_t)}$ ) of ABC transporter genes expression used to generate the hierarchical clustering in P493-6 cell line.**

|        | P493-6 0h | P493-6 12h   | P493-6 24h   | P493-6 24h   |
|--------|-----------|--------------|--------------|--------------|
| abca2  | 0         | -0.531879033 | -0.602392817 | -0.506667614 |
| abca3  | 0         | -0.57664809  | -0.476948729 | -0.696449289 |
| abcb9  | 0         | -0.202524264 | -0.430782916 | -0.405465108 |
| abcb10 | 0         | -0.446287103 | -0.644357016 | -0.502526821 |
| abcc1  | 0         | -0.371063681 | -0.570392986 | -0.65082289  |
| abcc2  | 0         | -0.776528789 | -0.425667815 | -0.415515444 |
| abcc4  | 0         | -0.366244395 | -0.366244395 | -0.510825624 |
| abcd3  | 0         | -0.456758402 | -0.415515444 | -0.488846717 |
| abce1  | 0         | -0.916290732 | -0.836248024 | -0.713349888 |
| abcf1  | 0         | -0.405465108 | -0.292136423 | -0.274436846 |
| abcf2  | 0         | -0.755022584 | -0.84397007  | -0.950192284 |
| abcf3  | 0         | -0.588787165 | -0.423120043 | -0.980829253 |
| abcb6  | 0         | 0.067658648  | 0.317240875  | 0.414314723  |
| abcb7  | 0         | 0.009950331  | 0.086177696  | -0.097980408 |
| abcb8  | 0         | 0.016529302  | 0.136859183  | 0.058268908  |
| abcc5  | 0         | 0.116300456  | 0.322083499  | 0.326902786  |
| abcc7  | 0         | -0.349557476 | 0.364643114  | 0.548121409  |
| abcd4  | 0         | 0.292669614  | 0.446820294  | 0.585933096  |
| abcg4  | 0         | -0.606969484 | 0.364643114  | 0.395414772  |
| abca1  | 0         | 0.613382212  | 0.749842524  | 1.281859343  |
| abca4  | 0         | 1.145283808  | 1.212932546  | 1.065859502  |
| abca5  | 0         | 0.681411924  | 0.925580779  | 1.191900223  |
| abca7  | 0         | 1.158975438  | 1.659497112  | 1.986046194  |
| abca10 | 0         | -0.090654368 | 0.259796869  | 0.598836501  |
| abcb2  | 0         | 0.538440791  | 0.622366998  | 0.631271777  |
| abcb3  | 0         | 0.262364264  | 0.955511445  | 1.029619417  |
| abcc6  | 0         | 0.770108222  | 0.802001585  | 1.208960346  |
| abcc8  | 0         | 0.862889955  | 0.88376754   | -0.030459207 |
| abcc10 | 0         | 0.185095484  | 0.385262401  | 0.733969175  |
| abcc11 | 0         | 0.810930216  | 1.17557333   | 1.643742716  |
| abcd1  | 0         | 0.90691357   | 1.151626324  | 1.470941835  |
| abcg1  | 0         | 0.116300456  | 0.714314723  | 0.904218151  |
